# Supplementary material for: Spatial and temporal dynamics of malaria in Madagascar
Source: PubMed Central journal article supplement (PMC5796477; doi:10.1186/s12936-018-2206-8), 2018-02-01

## Additional file 2: Malaria incidence per age-classes per stratum

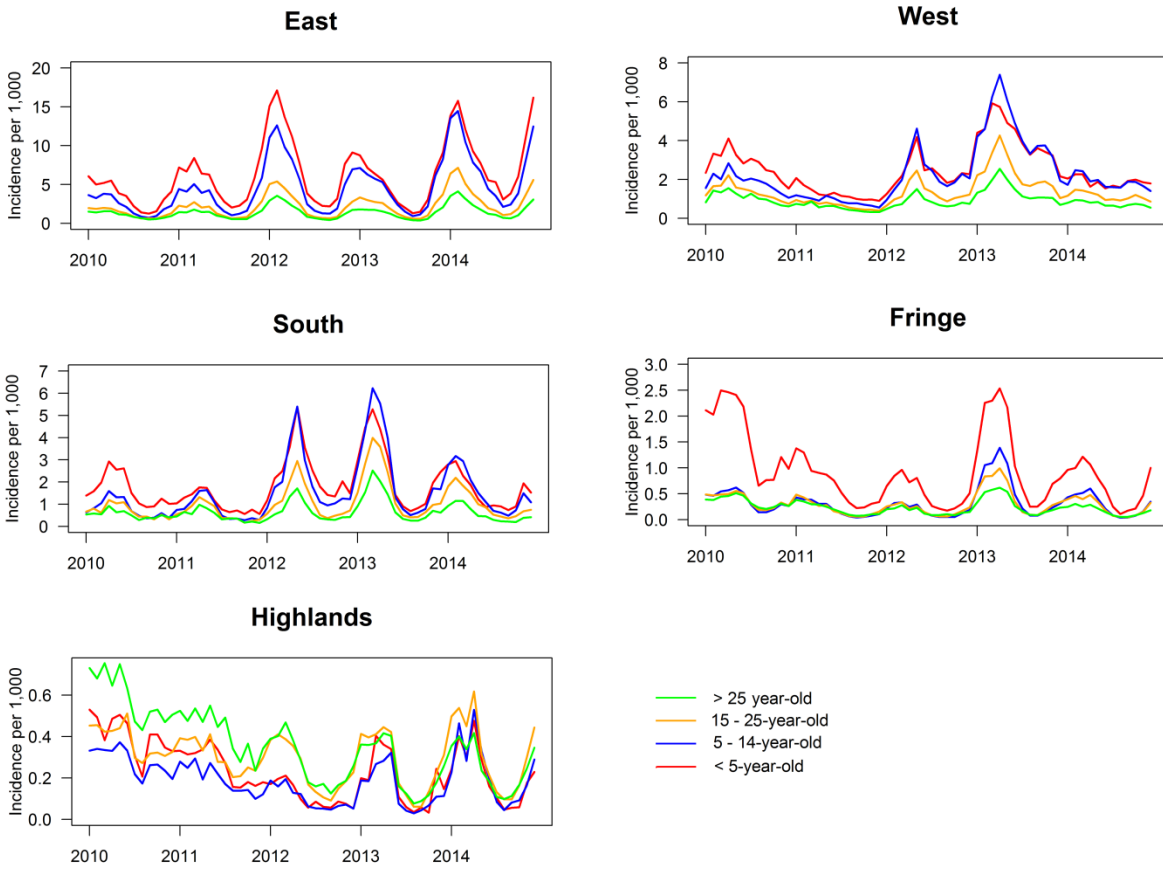

Supplement: 12936_2018_2206_MOESM2_ESM.pdf [file 12936_2018_2206_MOESM2_ESM.pdf]
