# Supplementary material for: Spatial and temporal dynamics of malaria in Madagascar
Source: Springer Nature journal article supplement (doi:10.1186/s12936-018-2206-8), 2018-02-01

**Additional file 1: Incidence per year from 2000 to 2016**

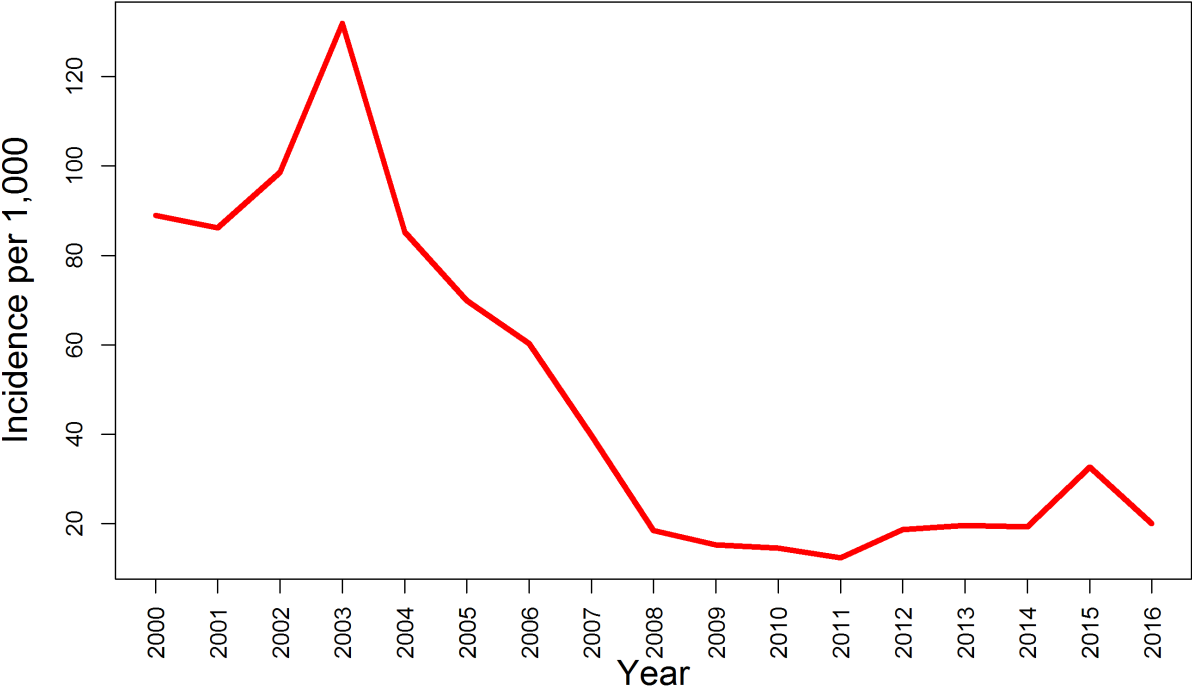

Supplement: MOESM1 [file 15432892]
