# Supplementary material for: Spatial and temporal dynamics of malaria in Madagascar
Source: Springer Nature journal article supplement (doi:10.1186/s12936-018-2206-8), 2018-02-01
Supplement: MOESM3 [file 15432892]

**Additional file 3: Number of districts per malaria intensity within stratification.** The West has the most number of district within stratification and the South the lowest. The number of district with high incidence increased across the year mainly in 2013 within stratification.

| Stratum             | Year | n   |       |        |      |        |         |
|---------------------|------|-----|-------|--------|------|--------|---------|
|                     |      | Low | Lower | Lowest | High | Higher | Highest |
| East<br>(n= 29)     | 2010 | 0   | 5     | 10     | 12   | 2      | 0       |
|                     | 2011 | 2   | 6     | 8      | 9    | 4      | 0       |
|                     | 2012 | 4   | 4     | 7      | 11   | 2      | 1       |
|                     | 2013 | 2   | 6     | 8      | 10   | 3      | 0       |
|                     | 2014 | 6   | 4     | 6      | 9    | 4      | 0       |
| West<br>(n= 39)     | 2010 | 4   | 4     | 14     | 11   | 6      | 0       |
|                     | 2011 | 4   | 5     | 9      | 17   | 4      | 0       |
|                     | 2012 | 4   | 5     | 12     | 12   | 6      | 0       |
|                     | 2013 | 4   | 1     | 15     | 13   | 6      | 0       |
|                     | 2014 | 5   | 3     | 8      | 17   | 6      | 0       |
| South<br>(n=7)      | 2010 | 1   | 3     | 1      | 0    | 2      | 0       |
|                     | 2011 | 0   | 2     | 2      | 3    | 0      | 0       |
|                     | 2012 | 0   | 3     | 2      | 1    | 1      | 0       |
|                     | 2013 | 1   | 0     | 4      | 1    | 1      | 0       |
|                     | 2014 | 1   | 2     | 2      | 1    | 1      | 0       |
| Fringe<br>(n=16)    | 2010 | 2   | 5     | 4      | 3    | 1      | 1       |
|                     | 2011 | 2   | 4     | 2      | 3    | 5      | 0       |
|                     | 2012 | 2   | 4     | 3      | 4    | 2      | 1       |
|                     | 2013 | 1   | 2     | 4      | 5    | 4      | 0       |
|                     | 2014 | 2   | 3     | 1      | 7    | 2      | 1       |
| Highlands<br>(n=20) | 2010 | 7   | 8     | 2      | 2    | 1      | 0       |
|                     | 2011 | 5   | 6     | 6      | 2    | 1      | 0       |
|                     | 2012 | 1   | 4     | 8      | 6    | 1      | 0       |
|                     | 2013 | 1   | 2     | 9      | 7    | 1      | 0       |
|                     | 2014 | 4   | 5     | 6      | 2    | 3      | 0       |
| Total               |      | 65  | 96    | 153    | 168  | 69     | 4       |

n: number of district
