# Supplementary material for: Spatial and temporal dynamics of malaria in Madagascar
Source: Springer Nature journal article supplement (doi:10.1186/s12936-018-2206-8), 2018-02-01
Supplement: MOESM4 [file 15432892]

#### Additional file 4: Malaria clustering using the retrospective spatial analysis

| Stratum | Year | Type | N    | RR     | LLR       | p-value                      | District name        |
|---------|------|------|------|--------|-----------|------------------------------|----------------------|
| East    | 2010 | 1    | 8    | 1.65   | 3,170.10  | 0.00                         |                      |
|         |      | 2    | 1    | 2.29   | 2,860.91  | 0.00                         | Taolagnaro           |
|         |      | 3    | 1    | 3.04   | 1,238.59  | 0.00                         | AntanambaoManampotsy |
|         |      | 4    | 1    | 1.27   | 94.33     | 0.00                         | Marolambo            |
|         |      | 5    | 1    | 1.17   | 48.27     | 0.00                         | Brickaville          |
|         |      | 6    | 1    | 1.09   | 15.55     | 0.00                         | Toamasina II         |
|         | 2011 | 1    | 5    | 2.56   | 12,764.99 | 0.00                         |                      |
|         |      | 2    | 4    | 1.82   | 4,609.89  | 0.00                         |                      |
|         |      | 3    | 1    | 2.24   | 2,229.13  | 0.00                         | Ifanadiana           |
|         |      | 4    | 1    | 1.71   | 791.74    | 0.00                         | Marolambo            |
|         | 2012 | 1    | 15   | 2.73   | 28,479.19 | 0.00                         |                      |
|         |      | 2    | 1    | 1.55   | 1,193.71  | 0.00                         | Toamasina II         |
|         | 2013 | 1    | 13   | 2.82   | 21,633.81 | 0.00                         |                      |
|         |      | 2    | 1    | 1.12   | 47.90     | 0.00                         | Toamasina II         |
|         | 2014 | 1    | 15   | 3.12   | 42,857.07 | 0.00                         |                      |
| 2       |      | 1    | 1.18 | 213.13 | 0.00      | Taolagnaro                   |                      |
| West    | 2010 | 1    | 15   | 2.81   | 13,515.79 | 0.00                         |                      |
|         |      | 2    | 1    | 1.37   | 49.28     | 0.00                         | Benenitra            |
|         |      | 3    | 1    | 1.18   | 39.62     | 0.00                         | Miandrivazo          |
|         | 2011 | 1    | 20   | 2.02   | 2,969.37  | 0.00                         |                      |
|         |      | 2    | 1    | 1.99   | 238.82    | 0.00                         | Ankazoabo            |
|         |      | 3    | 2    | 1.20   | 27.85     | 0.00                         |                      |
|         |      | 4    | 1    | 1.17   | 27.08     | 0.00                         | Ambilobe             |
|         | 2012 | 1    | 17   | 2.67   | 11,607.36 | 0.00                         |                      |
|         |      | 2    | 1    | 1.50   | 246.49    | 0.00                         | Morondava            |
|         |      | 3    | 1    | 1.30   | 31.45     | 0.00                         | Benenitra            |
|         |      | 4    | 1    | 1.10   | 11.14     | 0.00                         | Morombe              |
|         | 2013 | 1    | 23   | 2.16   | 12,506.40 | 0.00                         |                      |
|         |      | 2    | 2    | 1.42   | 750.55    | 0.00                         |                      |
|         |      | 3    | 1    | 1.30   | 112.21    | 0.00                         | Mahajanga II         |
|         | 2014 | 1    | 19   | 2.27   | 6,437.067 | 0.00                         |                      |
|         |      | 2    | 1    | 2.26   | 1,264.24  | 0.00                         | Analalava            |
|         |      | 3    | 1    | 1.29   | 79.43     | 0.00                         | Antsohihy            |
|         |      | 4    | 1    | 1.38   | 76.99     | 0.00                         | Mahajanga II         |
| 5       |      | 1    | 1.30 | 76.47  | 0.00      | Tsaratana                    |                      |
| 6       |      | 1    | 1.15 | 29.50  | 0.00      | Port-Berge (Boroziny-Vaovao) |                      |
| South   | 2010 | 1    | 2    | 7.48   | 5,620.87  | 0.00                         |                      |
|         | 2011 | 1    | 3    | 3.83   | 1,982.88  | 0.00                         |                      |
|         | 2012 | 1    | 1    | 4.53   | 4,901.60  | 0.00                         | AmboasaryAtsimo      |
|         |      | 2    | 1    | 1.95   | 628.96    | 0.00                         | Bekily               |
|         | 2013 | 1    | 1    | 3.64   | 3,623.23  | 0.00                         | Bekily               |
|         | 2014 | 1    | 3    | 5.09   | 4456.20   | 0.00                         |                      |

Continued

**Additional file 4: continued**

| <b>Stratum</b> | <b>Year</b> | <b>Type</b> | <b>N</b> | <b>RR</b> | <b>LLR</b> | <b>p-value</b> | <b>District name</b>     |
|----------------|-------------|-------------|----------|-----------|------------|----------------|--------------------------|
| Fringe         | 2010        | 1           | 1        | 6.64      | 6,185.41   | 0.00           | Anosibe-An'Ala           |
|                |             | 2           | 1        | 3.77      | 5,725.62   | 0.00           | Tsiroanomandidy          |
|                |             | 3           | 1        | 1.35      | 159.18     | 0.00           | Betafo                   |
|                | 2011        | 1           | 1        | 4.79      | 1,729.24   | 0.00           | Anosibe-An'Ala           |
|                |             | 2           | 1        | 2.25      | 866.01     | 0.00           | Tsiroanomandidy          |
|                |             | 3           | 2        | 1.56      | 181.04     | 0.00           |                          |
|                |             | 4           | 1        | 1.48      | 143.49     | 0.00           | Moramanga                |
|                |             | 5           | 1        | 1.44      | 115.77     | 0.00           | Betafo                   |
|                |             | 6           | 1        | 1.52      | 48.02      | 0.00           | Andilamena               |
|                | 2012        | 1           | 2        | 3.88      | 2,585.47   | 0.00           |                          |
|                |             | 2           | 1        | 2.77      | 655.42     | 0.00           | Mandoto                  |
|                |             | 3           | 1        | 2.68      | 229.61     | 0.00           | Iakora                   |
|                |             | 4           | 1        | 1.46      | 31.84      |                | Andilamena               |
|                |             | 5           | 1        | 1.28      | 10.40      | 0.00           | Ivohibe                  |
|                | 2013        | 1           | 1        | 2.78      | 1,636.62   | 0.00           | Mandoto                  |
|                |             | 2           | 1        | 2.97      | 1,260.86   | 0.00           | Anosibe-An'ala           |
|                |             | 3           | 3        | 1.63      | 527.46     | 0.00           |                          |
|                |             | 4           | 1        | 2.05      | 349.29     | 0.00           | Andilamena               |
|                |             | 5           | 2        | 1.42      | 234.22     | 0.00           |                          |
|                |             | 6           | 1        | 1.12      | 23.11      | 0.00           | Tsiroanomandidy          |
| 2014           | 1           | 9           | 2.46     | 18.68     | 0.00       |                |                          |
|                | 2           | 1           | 1.56     | 115.76    | 0.00       | Ankazobe       |                          |
|                | 3           | 1           | 1.51     | 48.77     | 0.00       | Andilamena     |                          |
|                | 4           | 1           | 1.25     | 43.87     | 0.00       | Moramanga      |                          |
| Highlands      | 2010        | 1           | 1        | 9.37      | 16,337.85  | 0.00           | Antananarivo Renivohitra |
|                |             | 2           | 1        | 1.33      | 37.71      | 0.00           | Soavinandriana           |
|                | 2011        | 1           | 1        | 5.48      | 6,751.65   | 0.00           | Antananarivo Renivohitra |
|                |             | 2           | 1        | 1.59      | 78.73      | 0.00           | Soavinandriana           |
|                | 2012        | 1           | 1        | 2.00      | 574.11     | 0.00           | Antananarivo Renivohitra |
|                |             | 2           | 1        | 2.59      | 369.97     | 0.00           | Ambositra                |
|                |             | 3           | 3        | 1.49      | 114.88     | 0.00           |                          |
|                |             | 4           | 1        | 1.93      | 108.91     | 0.00           | Fianarantsoa I           |
|                | 2013        | 1           | 1        | 5.38      | 1,927.12   | 0.00           | Ambositra                |
|                |             | 2           | 1        | 1.75      | 92.77      | 0.00           | Ambohimahasoa            |
|                |             | 3           | 1        | 1.46      | 42.41      | 0.00           | Miarinarivo              |
|                |             | 4           | 1        | 1.41      | 36.34      | 0.00           | Ambatolampy              |
|                |             | 5           | 1        | 1.31      | 29.34      | 0.00           | Antananarivo Avaradrano  |
|                | 2014        | 6           | 2        | 1.18      | 18.82      | 0.00           |                          |
|                |             | 1           | 5        | 5.45      | 5,428.68   | 0.00           |                          |
|                |             | 2           | 1        | 2.81      | 450.58     | 0.00           | Soavinandriana           |

Type: 1: the primary cluster; 2, 3, 4, 5, 6, 7: secondary clusters

N: number of district was detected by retrospective space-time analysis

RR: Relative risk; LLR: Log likelihood ratio
