# Supplementary material for: Spatial and temporal dynamics of malaria in Madagascar
Source: Springer Nature journal article supplement (doi:10.1186/s12936-018-2206-8), 2018-02-01
Supplement: MOESM5 [file 15432892]

### Additional file 5: Malaria clustering using the retrospective space-time analysis

| Year | Stratum   | Time frame        | Type | N  | RR    | LLR       | p-value | District name            |
|------|-----------|-------------------|------|----|-------|-----------|---------|--------------------------|
| 2010 | East      | January-May       | 1    | 15 | 2.40  | 9,423.64  | 0.00    |                          |
|      | East      | January-June      | 2    | 1  | 3.61  | 4,858.05  | 0.00    | Taolagnaro               |
|      | East      | December          | 3    | 1  | 2.95  | 671.75    | 0.00    | Vangaindrano             |
|      | West      | February-July     | 1    | 14 | 2.91  | 12,197.14 | 0.00    |                          |
|      | West      | April-July        | 2    | 1  | 2.50  | 212.21    | 0.00    | Benenitra                |
|      | South     | February-July     | 1    | 2  | 6.85  | 4,736.00  | 0.00    |                          |
|      | Fringe    | January-June      | 1    | 1  | 10.87 | 7,131.47  | 0.00    | Anosibe-An'Ala           |
|      | Fringe    | February-July     | 2    | 1  | 4.34  | 4,514.72  | 0.00    | Tsiroanomandidy          |
|      | Highlands | January-June      | 1    | 1  | 6.62  | 9,795.57  | 0.00    | Antananarivo Renivohitra |
|      | Highlands | April-June        | 2    | 1  | 1.21  | 106.10    | 0.00    | Soavinandriana           |
| 2011 | East      | January-May       | 1    | 6  | 3.34  | 14,459.87 | 0.00    |                          |
|      | East      | November-December | 2    | 4  | 3.00  | 4,557.27  | 0.00    |                          |
|      | West      | January-June      | 1    | 18 | 2.15  | 3,088.58  | 0.00    |                          |
|      | South     | January-June      | 1    | 3  | 4.44  | 2,443.35  | 0.00    |                          |
|      | South     | April-May         | 2    | 1  | 2.30  | 71.23     | 0.00    | Tsihombe                 |
|      | Fringe    | January-May       | 1    | 5  | 3.99  | 3,521.30  | 0.00    |                          |
|      | Highlands | February-July     | 1    | 1  | 4.93  | 4,537.51  | 0.00    | Antananarivo Renivohitra |
|      | Highlands | January-May       | 2    | 1  | 2.81  | 242.51    | 0.00    | Soavinandriana           |
|      | Highlands | January-April     | 3    | 1  | 1.96  | 89.81     | 0.00    | Ambositra                |
|      | Highlands | April-May         | 4    | 1  | 1.71  | 19.70     | 0.00    | Fianarantsoa I           |
| 2012 | East      | January-April     | 1    | 15 | 4.05  | 53,727.07 | 0.00    |                          |
|      | West      | March-August      | 1    | 17 | 2.74  | 10,706.59 | 0.00    |                          |
|      | South     | February-July     | 1    | 1  | 6.24  | 5,598.45  | 0.00    | AmboasaryAtsimo          |
|      | South     | April-May         | 2    | 1  | 5.74  | 1,791.54  | 0.00    | Bekily                   |
|      | South     | May               | 3    | 3  | 1.38  | 41.94     | 0.00    |                          |
|      | Fringe    | January-May       | 1    | 2  | 7.13  | 4,027.62  | 0.00    |                          |
|      | Fringe    | March-May         | 2    | 3  | 1.77  | 166.02    | 0.00    |                          |
|      | Highlands | January-May       | 1    | 1  | 3.04  | 989.31    | 0.00    | Antananarivo Renivohitra |
|      | Highlands | January-April     | 2    | 12 | 2.01  | 501.03    | 0.00    |                          |
| 2013 | East      | November-December | 1    | 12 | 3.35  | 16,855.47 | 0.00    |                          |
|      | East      | January-April     | 2    | 1  | 1.38  | 146.13    | 0.00    | Antalaha                 |
|      | East      | March-April       | 3    | 1  | 1.28  | 30.44     | 0.00    | MananaraAvaratra         |
|      | West      | January-June      | 1    | 23 | 2.35  | 14,889.50 | 0.00    |                          |
|      | West      | February-July     | 2    | 2  | 1.94  | 1,664.14  | 0.00    |                          |

Continued

**Additional file 5: continued**

| <b>Year</b> | <b>Stratum</b> | <b>Time frame</b> | <b>Type</b> | <b>N</b> | <b>RR</b> | <b>LLR</b> | <b>p-value</b> | <b>District name</b>    |                           |
|-------------|----------------|-------------------|-------------|----------|-----------|------------|----------------|-------------------------|---------------------------|
| 2013        | South          | January-May       | 1           | 1        | 6.76      | 5,823.35   | 0.00           | Bekily                  |                           |
|             | South          | March-April       | 2           | 2        | 2.22      | 739.53     | 0.00           |                         |                           |
|             | South          | March-May         | 3           | 3        | 1.67      | 354.26     | 0.00           |                         |                           |
|             | Fringe         | January-May       | 1           | 9        | 3.23      | 5,410.33   | 0.00           |                         |                           |
|             | Fringe         | February-May      | 2           | 5        | 2.39      | 2,167.18   | 0.00           |                         |                           |
|             | Highlands      | January-May       | 1           | 6        | 4.53      | 2,563.18   | 0.00           | Antananarivo Avaradrano |                           |
|             | Highlands      | May               | 2           | 1        | 9.70      | 780.69     | 0.00           |                         |                           |
|             | Highlands      | April-May         | 3           | 2        | 5.32      | 612.28     | 0.00           |                         |                           |
|             | Highlands      | January-May       | 4           | 3        | 1.73      | 121.85     | 0.00           |                         |                           |
|             | Highlands      | November          | 5           | 1        | 2.99      | 120.79     | 0.00           |                         | Antananarivo Atsimondrano |
| 2014        | East           | January-April     | 1           | 14       | 3.14      | 40,937.33  | 0.00           |                         |                           |
|             | West           | January-June      | 1           | 7        | 2.38      | 3,026.48   | 0.00           |                         |                           |
|             | West           | July-December     | 2           | 3        | 2.68      | 1,161.34   | 0.00           |                         |                           |
|             | West           | February-July     | 3           | 2        | 1.92      | 696.10     | 0.00           |                         |                           |
|             | West           | January-March     | 4           | 6        | 1.45      | 491.43     | 0.00           |                         |                           |
|             | South          | January-May       | 1           | 3        | 4.73      | 4,125.68   | 0.00           |                         | Tsihombe                  |
|             | South          | January           | 2           | 1        | 2.06      | 41.77      | 0.00           |                         |                           |
|             | Fringe         | January-May       | 1           | 9        | 3.54      | 3274.93    | 0.00           |                         |                           |
|             | Fringe         | January-May       | 2           | 2        | 2.28      | 396.49     | 0.00           |                         |                           |
|             | Highlands      | January-May       | 1           | 5        | 8.06      | 6556.91    | 0.00           |                         |                           |
|             | Highlands      | February-June     | 2           | 1        | 5.44      | 827.57     | 0.00           |                         | Soavinandriana            |
|             | Highlands      | April-May         | 3           | 3        | 1.57      | 51.40      | 0.00           |                         | Antanifotsy               |
|             | Highlands      | December          | 4           | 1        | 2.03      | 25.50      | 0.00           |                         |                           |
|             | Highlands      | January           | 5           | 1        | 1.77      | 8.47       | 0.044          |                         |                           |

Type: 1: the primary cluster; 2, 3, 4, 5: the secondary clusters

N: number of district was detected by retrospective space-time analysis

RR: relative risk; LLR: log likelihood ratio
